# Supplementary material for: HDAC1-mediated repression of the retinoic acid-responsive gene ripply3 promotes second heart field development
Source: PubMed Central journal article supplement (PMC6538190; doi:10.1371/journal.pgen.1008165), 2019-05-15
Supplement: pgen.1008165.s014.pdf [file pgen.1008165.s014.pdf]

**S2 Table. Antibodies used.**

|                  | <b>Antibody</b>                  | <b>Supplier</b>  | <b>Product</b>     | <b>Procedure</b> | <b>Dilution</b> |
|------------------|----------------------------------|------------------|--------------------|------------------|-----------------|
| <b>Primary</b>   | rabbit anti-zebrafish Hdac1      | Gene Tex         | 124499             | Western Blot     | 1:1000          |
|                  | mouse anti-Alpha-Tubulin         | Sigma            | 6199               | Western Blot     | 1:1000          |
|                  | rabbit anti-DsRed2               | Clontech         | 632496             | Immunostaining   | 1:1000          |
|                  | mouse anti-MF20                  | DSHB             | MF20 (supernatant) | Immunostaining   | 1:10            |
|                  | mouse anti-S46                   | DSHB             | S46 (supernatant)  | Immunostaining   | 1:10            |
|                  | rabbit anti-zebrafish NKX2.5     | Gene Tex         | 128357             | Immunostaining   | 1:250           |
|                  | mouse anti-Histone H3            | Abcam            | ab14955            | Immunostaining   | 1:500           |
|                  | mouse anti-c-myc                 | Biolegend        | 626802             | EMSA             | 1:1000          |
|                  | rabbit anti-zebrafish Hdac1      | Abcam            | ab41407            | ChIP             | 1:100           |
|                  | rabbit anti-GFP                  | Abcam            | ab290              | ChIP             | 1:100           |
|                  | rabbit anti-H3K27ac              | Abcam            | ab4729             | ChIP             | 1:100           |
|                  | rabbit anti-H3K27me3             | Millipore        | 7449               | ChIP             | 1:100           |
|                  | sheep anti-Fluorescein-POD       | Sigma-Aldrich    | 11426346910        | FISH             | 1:50            |
|                  | sheep anti-DIG-POD               | Sigma-Aldrich    | 11207733910        | FISH             | 1:50            |
|                  | rabbit anti-zebrafish Elastin b  | YenZym           | N/A                | Immunostaining   | 1:250           |
|                  | rabbit anti-Zebrafish Vmhc       | YenZym           | N/A                | Immunostaining   | 1:250           |
| <b>Secondary</b> | donkey anti-Mouse IgG (H + L)    | Licor            | 925-32212          | Western Blot     | 1:10000         |
|                  | donkey anti-Rabbit IgG (H + L)   | Licor            | 925-68023          | Western Blot     | 1:10000         |
|                  | goat anti-mouse IgG1 TRITC       | Southern Biotech | 1070-03            | Immunostaining   | 1:100           |
|                  | goat anti-mouse IgG1 FITC        | Southern Biotech | 1070-02            | Immunostaining   | 1:100           |
|                  | goat anti-rabbit IgG-TRITC       | Southern Biotech | 4050-03            | Immunostaining   | 1:100           |
|                  | goat Anti-Rabbit IgG-FITC        | Southern Biotech | 4050-02            | Immunostaining   | 1:100           |
|                  | goat anti-mouse IgG1-DyLight 405 | BioLegend        | 409109             | Immunostaining   | 1:100           |
|                  | goat anti-mouse IgG2b TRITC      | Southern Biotech | 1090-03            | Immunostaining   | 1:100           |
|                  | goat anti-chicken IgG-FITC       | Southern Biotech | 6100-02            | Immunostaining   | 1:100           |
